# Supplementary material for: The Cellular and Molecular Determinants of Naphthoquinone-Dependent Activation of the Aryl Hydrocarbon Receptor
Source: PubMed Central journal article supplement (PMC7312509; doi:10.3390/ijms21114111), 2020-06-09
Supplement: ijms-21-04111-s001.pdf [file ijms-21-04111-s001.pdf]

Supplementary Materials

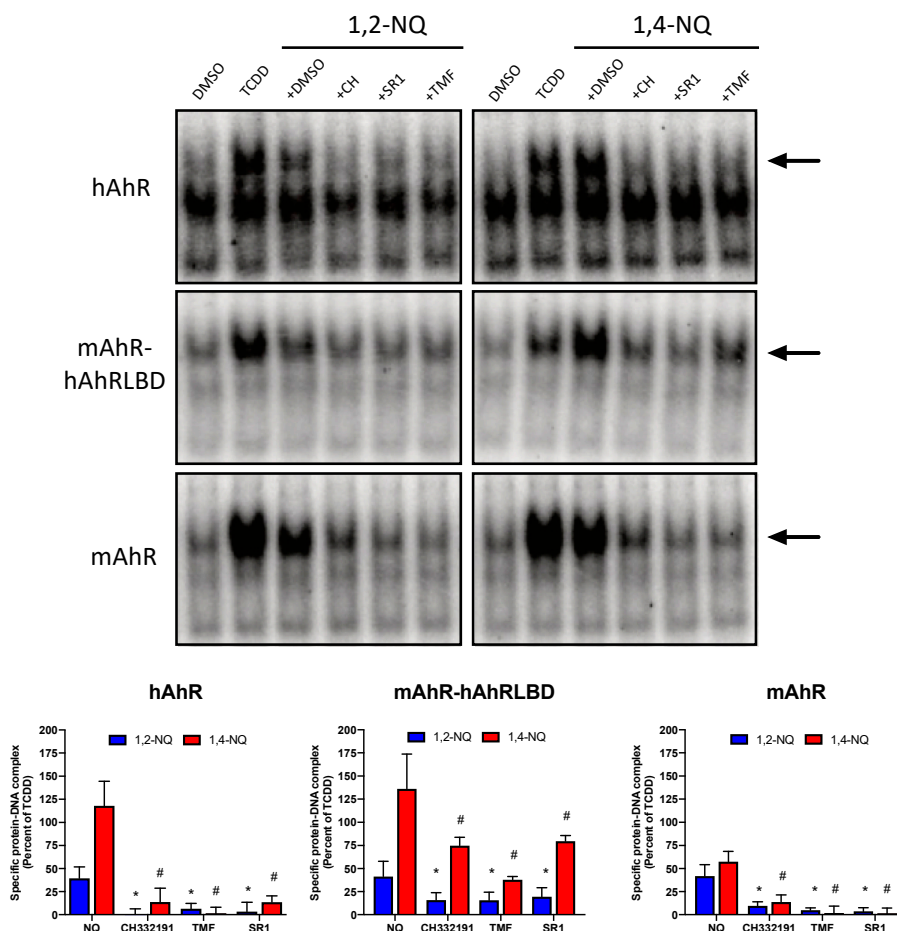

**Figure S1.** NQ-stimulated AhR DNA binding is inhibited by AhR antagonists. In vitro synthesized hAhR, chimeric mAHR-hAhRLBD, or mAHR and ARNT were incubated in the presence of DMSO (1%, *v/v*), TCDD (20 nM), 1,2-NQ (500 nM), or 1,4-NQ (500 nM) for 2 hours at room temperature in the absence or presence of AhR antagonists (CH223191 (10  $\mu$ M), SR1 (10  $\mu$ M), or TMF (10  $\mu$ M)) and AhR:DNA complexes visualized by gel retardation analysis as described under Material and Methods. Representative gels are shown and the arrows indicate position of the induced AhR:ARNT:DRE complex. Inducible AhR:ARNT:[<sup>32</sup>P]DRE complexes were quantified using Fujifilm MultiGauge software, values corrected for the amount of protein:DNA complex in the presence of DMSO (control), and then normalized to the amount of complex induced by TCDD. Values represent the mean  $\pm$  standard deviation of three exposure replicates and three experiments. Asterisks (\*) and number sign (#) indicate those values that are significantly reduced in the presence of an inhibitor relative to 1,2-NQ and 1,4-NQ, respectively.
